# Supplementary material
Source: publisher figshare collection journal article supplement (https://acs.figshare.com/ndownloader/files/14405546)
Supplement: Supplementary file 1 [file 14405546]

## Supporting Information

### **Ba<sub>2</sub>ScHO<sub>3</sub>: H<sup>-</sup> Conductive Layered Oxyhydride with H<sup>-</sup> Site Selectivity**

Fumitaka Takeiri,<sup>†,‡</sup> Akihiro Watanabe,<sup>†,‡</sup> Akihide Kuwabara,<sup>§</sup> Haq Nawaz,<sup>†,‡</sup> Nur Ika Puji Ayu,<sup>//</sup> Masao Yonemura,<sup>//</sup> Ryoji Kanno,<sup>#</sup> Genki Kobayashi<sup>\*†,‡</sup>

<sup>†</sup>Department of Materials Molecular Science, Institute for Molecular Science, 38 Nishigonaka, Myodaiji, Okazaki, Aichi 444-8585, Japan

<sup>‡</sup>SOKENDAI (The Graduate University for Advanced Studies), 38 Nishigonaka, Myodaiji, Okazaki, Aichi, 444-8585, Japan

<sup>‡</sup>Department of Electronic Chemistry, Interdisciplinary Graduate School of Science and Engineering, Tokyo Institute of Technology, 4259 Nagatsuta, Midori, Yokohama 226-8502, Japan

<sup>§</sup>Nanostructures Research Laboratory, Japan Fine Ceramics Center, 2-4-1 Mutsuno, Atsuta, Nagoya 456-8587, Japan

<sup>//</sup>Neutron Science Laboratory (KENS), Institute of Materials Structure Science, High Energy Accelerator Research Organization (KEK), 203-1 Shirakata, Tokai, Ibaraki 319-1106, Japan

<sup>#</sup>All-Solid-State Battery Unit, Institute of Innovative Research, Tokyo Institute of Technology, 4259 Nagatsuta, Midori, Yokohama 226-8502, Japan

#### **Table of Contents**

Figure S1. Laboratory XRD profile of BaScHO<sub>3</sub>.

Figure S2. All symmetrically independent H/O configurations in the conventional unit cell of Ba<sub>2</sub>ScHO<sub>3</sub> calculated in this study.

Figure S3. Optimized coordination environment of ScO<sub>5</sub>H in the supercells of Ba<sub>2</sub>ScO<sub>3</sub>H.

Figure S4. XRD profile of Ba<sub>2</sub>ScHO<sub>3</sub> before and after impedance measurement.

Figure S5. Impedance plot of BaScO<sub>2</sub>H at 300 °C.

Table S1. Structural parameters of BaO and Sc<sub>2</sub>O<sub>3</sub> from SXRD data.

Table S2. Structural parameters of BaScO<sub>2</sub>H from ND data.

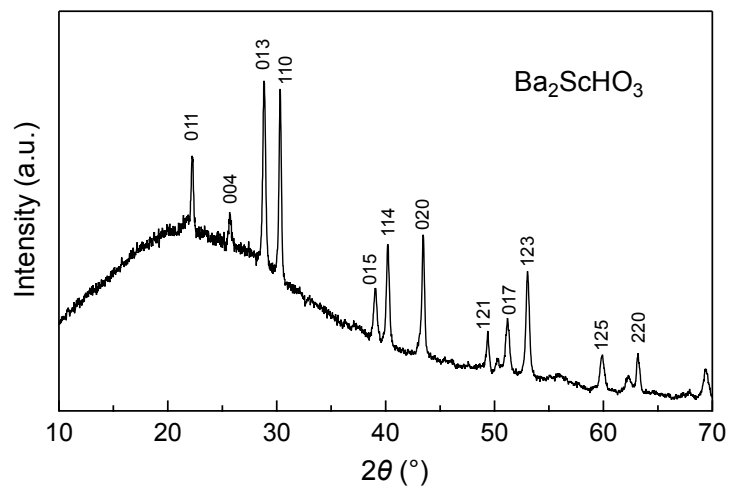

**Figure S1.** Laboratory XRD profile of BaScHO<sub>3</sub>. The large background at lower angles was derived from the Kapton film attached to the sample holder for air-sensitive samples.

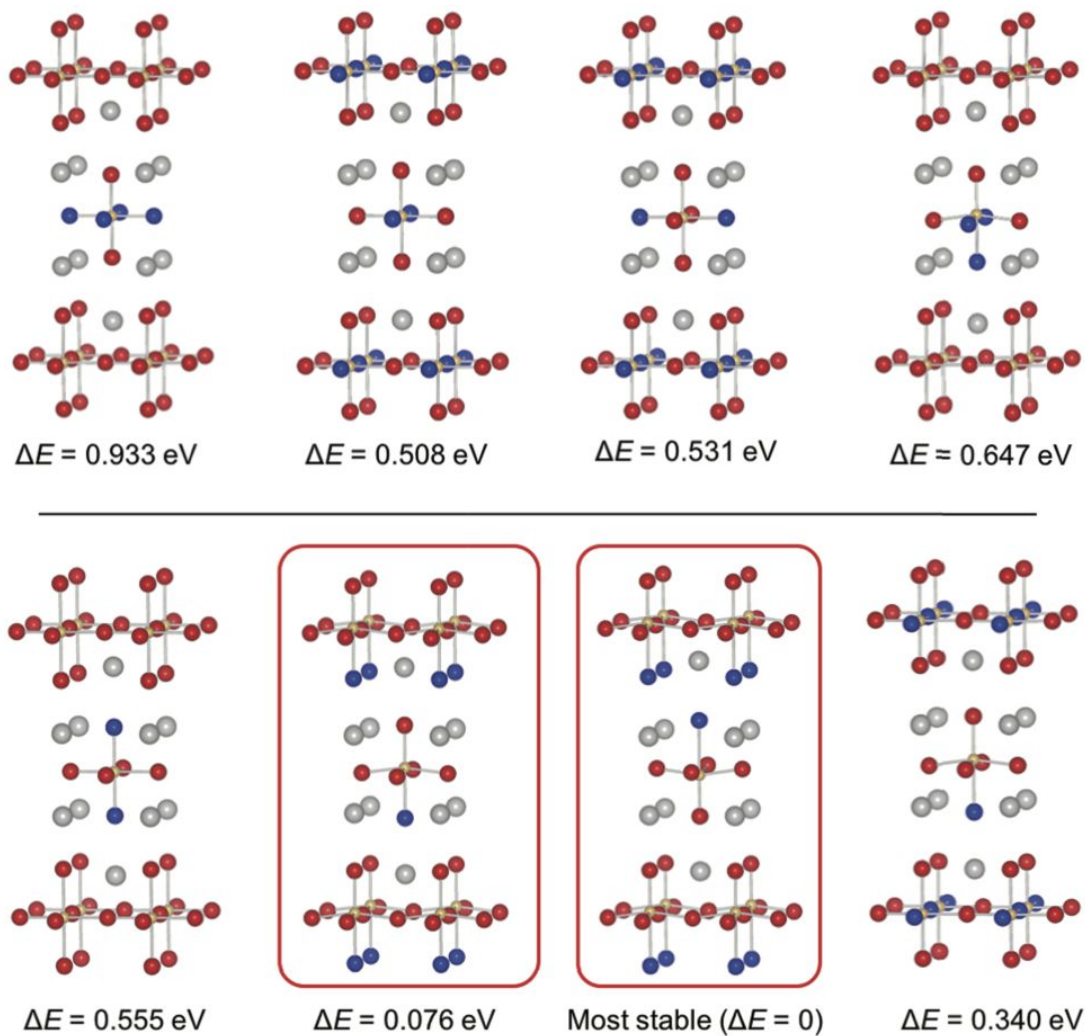

**Figure S2.** All symmetrically independent H/O configurations in the conventional unit cell of  $\text{Ba}_2\text{ScHO}_3$  calculated in this study. The values of relative energies compared with the most stable configuration are shown.

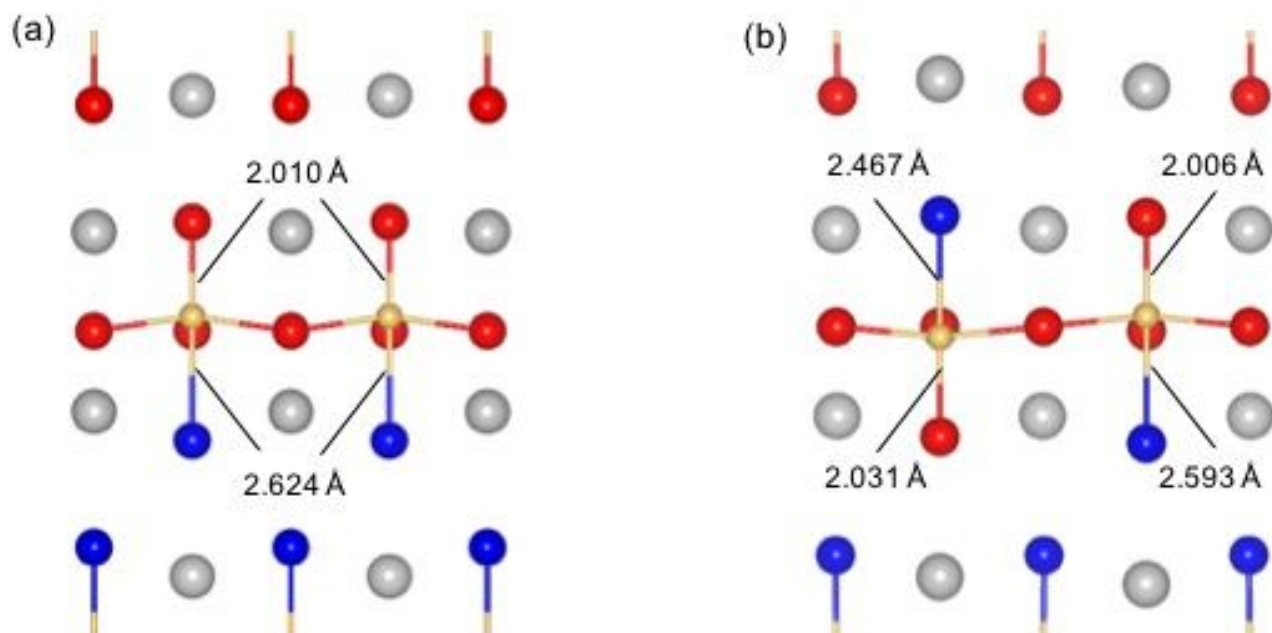

**Figure S3.** Optimized coordination environment of ScO<sub>5</sub>H in the supercells of Ba<sub>2</sub>ScO<sub>3</sub>H. Left and right images correspond to the supercells of Figures 3(a) and (b), respectively.

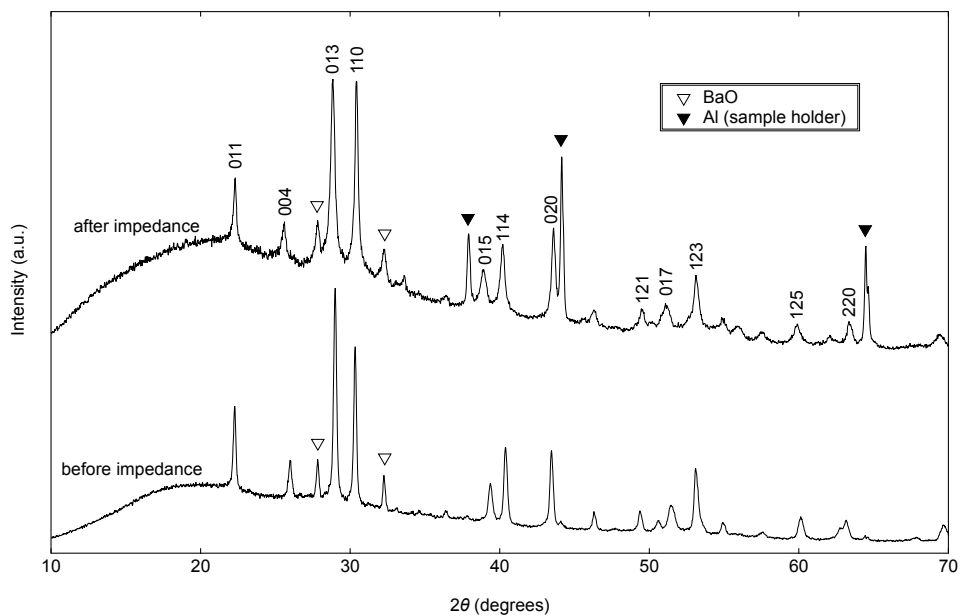

**Figure S4.** XRD profile of  $\text{Ba}_2\text{ScHO}_3$  before and after impedance measurement. The peaks with the open and closed triangle represent those of BaO and Al (sample holder), respectively. The sample lot is different from one for Figure S1.

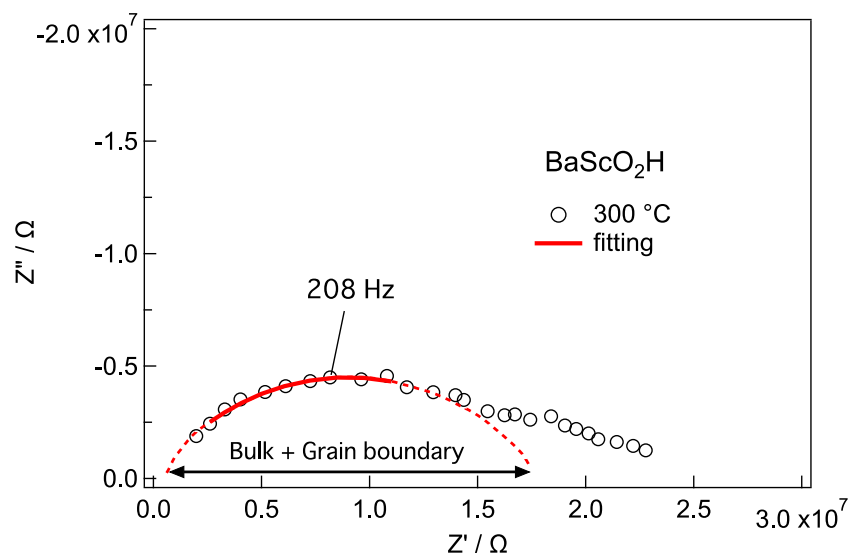

**Figure S5.** Impedance plot of BaScO<sub>2</sub>H at 300 °C.

**Table S1.** Structural parameters of BaO and Sc<sub>2</sub>O<sub>3</sub> from SXRD data.

BaO

| Atom | Site       | <i>g</i> | <i>x</i> | <i>y</i> | <i>z</i> | <i>B</i> / Å <sup>2</sup> |
|------|------------|----------|----------|----------|----------|---------------------------|
| Ba   | 4 <i>a</i> | 1        | 0        | 0        | 0        | 0.4                       |
| O1   | 4 <i>b</i> | 1        | 0.5      | 0.5      | 0.5      | 1.0                       |

*Fm*-3*m*, *a* = 5.53599(7) Å.Sc<sub>2</sub>O<sub>3</sub>

| Atom | Site        | <i>g</i> | <i>x</i> | <i>y</i> | <i>z</i> | <i>B</i> / Å <sup>2</sup> |
|------|-------------|----------|----------|----------|----------|---------------------------|
| Sc1  | 8 <i>b</i>  | 1        | 0.25     | 0.25     | 0.25     | 0.5                       |
| Sc2  | 24 <i>d</i> | 1        | 0.4649   | 0        | 0.25     | 0.5                       |
| O    | 48 <i>e</i> | 1        | 0.3928   | 0.1528   | 0.3802   | 1.0                       |

*Ia*-3, *a* = 9.8484(11) Å.**Table S2.** Structural parameters of BaScO<sub>2</sub>H from ND data.

| Atom | Site       | <i>g</i> | <i>x</i> | <i>y</i> | <i>z</i> | <i>B</i> / Å <sup>2</sup> |
|------|------------|----------|----------|----------|----------|---------------------------|
| Ba   | 1 <i>b</i> | 1        | 0.5      | 0.5      | 0.5      | 0.4                       |
| Sc   | 1 <i>a</i> | 1        | 0        | 0        | 0        | 0.70(3)                   |
| O    | 3 <i>d</i> | 0.667    | 0.5      | 0        | 0        | 0.83(2)                   |
| H    | 3 <i>d</i> | 0.333    | 0.5      | 0        | 0        | = <i>B</i> (O)            |

*Pm*-3*m*, *a* = 4.15254(3) Å.
